# Supplementary material for: Communication interventions to improve adherence to infection control precautions: a randomised crossover trial
Source: PubMed Central journal article supplement (PMC3599084; doi:10.1186/1471-2334-13-72), 2013-02-06
Supplement: 1471-2334-13-72-S1.pdf [file 1471-2334-13-72-S1.pdf]

## Observational Tool

Date:

Porter:

Ward:

Interventions:      Checklist      Coloured Cue      Both      Control

Patient's infectious status:      Contact precautions      Non-infectious

### Timing of transfer:

Porter departed Radiology:

Porter arrived at ward:

Porter departed ward with patient:

Porter arrived at Radiology with patient:

### Communication of infection control precautions:

At Radiology prior to patient collection:      Y      N

At the ward on patient collection:      Y      N

Transfer form completed (Radiology):      Y      N

Transfer form completed (ward):      Y      N

Precautions taken by porter:      Hand hygiene      Gloves      Gown      None

Adherence to checklist:      Y      N

### Descriptive data:
